# Supplementary material for: Monocarboxylate Transporter 1 (MCT1) is an independent prognostic biomarker in endometrial cancer
Source: PubMed Central journal article supplement (PMC5745908; doi:10.1186/s12907-017-0067-7), 2017-12-28
Supplement: 12907_2017_67_MOESM1_ESM.pdf [file 12907_2017_67_MOESM1_ESM.pdf]

## **Monocarboxylate Transporter 1 (MCT1) is an independent prognostic biomarker in endometrial cancer**

Ayşe Latif<sup>1</sup>, Amy L. Chadwick<sup>1,2</sup>, Sarah J. Kitson<sup>2</sup>, Hannah J. Gregson<sup>2</sup>, Vanitha N. Sivalingam<sup>2</sup>, James Bolton<sup>3</sup>, Rhona J. McVey<sup>3</sup>, Stephen A. Roberts<sup>4</sup>, Kay M. Marshall<sup>1</sup>, Kaye J. Williams<sup>1</sup>, Ian J. Stratford<sup>1</sup>, Emma J. Crosbie<sup>2,5\*</sup>

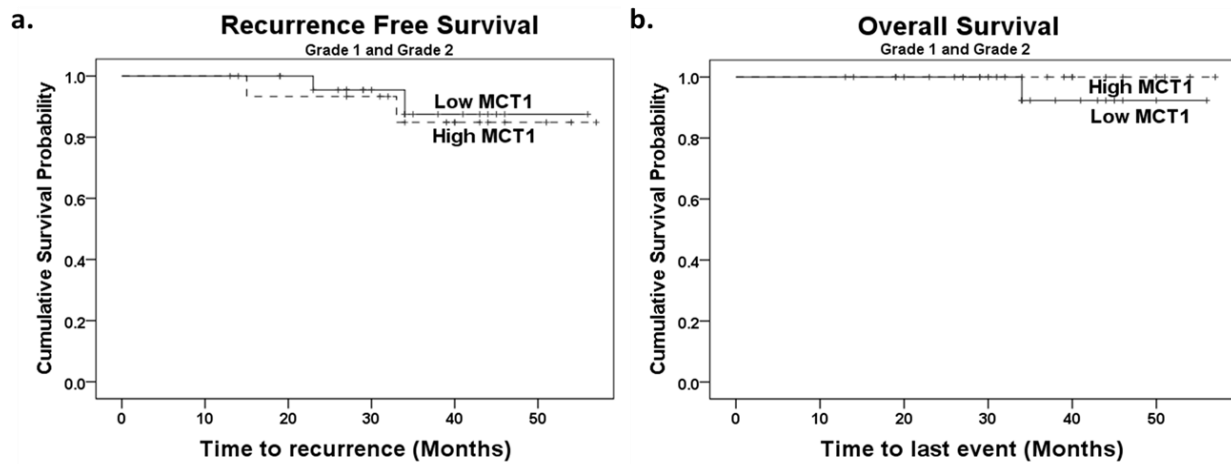

**Supplementary Figure 1:** Kaplan-Meier survival analysis for grade I/II tumours. In grade I/II tumours **(a)** Recurrence free survival; there were two recurrences in each of the low and high MCT1 expressing tissues. **(b)** Overall survival; there was only one death in the low MCT1 tumours and non in the high MCT1 expressing tumours. As there were no events in grade I/II tumours no plot can be drawn for cancer specific survival.
